# Supplementary material
Source: Springer Nature journal article supplement (https://www.springermedizin.de/resource/supplementary/12904_2007_39_MOESM3_ESM.pdf/9518004)
Supplement: MOESM3 [file 9518004]

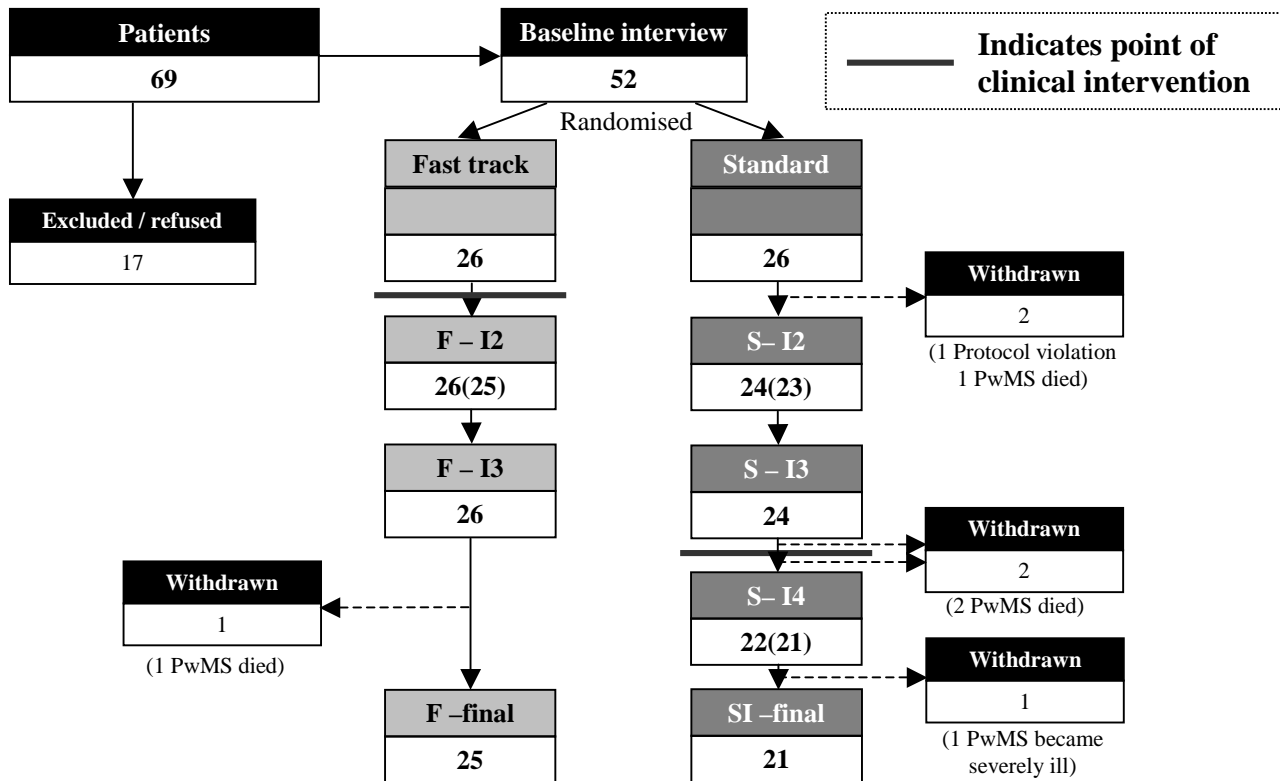

N (N) = patients remaining in study (interviews actually completed at this stage).  
Interviews missed because patient unavailable (away/in hospital) /timing error.
